# Supplementary material
Source: PubMed Central journal article supplement (PMC3837806)
Supplement: AEM.02831-13_zam999104939so1.pdf [file AEM.02831-13_zam999104939so1.pdf]

Risk Factors Associated with *Salmonella* and *Listeria monocytogenes* Contamination in Produce Fields

Questionnaire Completed by:

Farm Name:

Date of Visit:

**General Questions**

**1. Size of farm (approximate acreage):**

**2. Number of year round staff:**

0-4

5-9

10-20

20-30

30 or more

**3. Number of temporary staff:**

0-4

5-9

10-20

20-30

30 or more

**4. Does your farm own all of its own equipment?**

Yes

No

Other (list)

**5. Does your farm perform any microbial testing? And what is tested?**

Yes

No

**6. Series of follow up questions to microbial testing (only fill out if answer to #5 is yes)**

**Who requires that you perform microbial testing?**

Farm owners

Retail buyers

Other (list)

**What is tested?**

Produce

Irrigation water

Equipment

Soil

Other (list)

Risk Factors Associated with *Salmonella* and *Listeria monocytogenes* Contamination in Produce Fields

Questionnaire Completed by:

Farm Name:

Date of Visit:

**What organisms are tested for?**

*E. coli* generic

*E. coli* O157

*Listeria monocytogenes*

*Salmonella*

Other (list)

**7. Types of wildlife control used:**

Poison bait

Fences

Hunting

Other (list)

None

**8. Is food safety training provided to workers?**

Yes

No

Other (list)

**9. Are workers supervised in the fields?**

Yes

No

Other (list)

**10. Is food safety training provided to workers in their native language?**

Yes

No

Other (list)

**11. Are toilets and handwashing facilities available within quarter mile to field workers?**

Yes

No

Other (list)

**12. What is the cleaning schedule for toilets?**

Daily

2 times per week

Weekly

Other (list)

Risk Factors Associated with *Salmonella* and *Listeria monocytogenes* Contamination in Produce Fields

Questionnaire Completed by:

Farm Name:

Date of Visit:

**13. What is the cleaning schedule for handwashing station?**

Daily

2 times per week

Weekly

Other (list)

**14. Are signs posted advocating food safety/sanitation practices?**

Yes

Where:

No

Other (list)

**15. If produce is field packed, do boxes touch ground?**

Yes

No

Other (list)

Risk Factors Associated with *Salmonella* and *Listeria monocytogenes* Contamination in Produce Fields

Questionnaire Completed by:

Farm Name:

Date of Visit:

**Field Specific Questions**

**1. Have pesticides been applied in the field recently?**

| Field         | Field         | Field         | Field         | Field         |
|---------------|---------------|---------------|---------------|---------------|
| Within 7 days |
| 8 to 14 days  |
| 15 to 30 days |
| 31 or more    |

| Field         | Field         | Field         | Field         | Field         |
|---------------|---------------|---------------|---------------|---------------|
| Within 7 days |
| 8 to 14 days  |
| 15 to 30 days |
| 31 or more    |

| Field         | Field         | Field         | Field         | Field         |
|---------------|---------------|---------------|---------------|---------------|
| Within 7 days |
| 8 to 14 days  |
| 15 to 30 days |
| 31 or more    |

| Field         | Field         | Field         | Field         | Field         |
|---------------|---------------|---------------|---------------|---------------|
| Within 7 days |
| 8 to 14 days  |
| 15 to 30 days |
| 31 or more    |

Risk Factors Associated with *Salmonella* and *Listeria monocytogenes* Contamination in Produce Fields

Questionnaire Completed by:

Farm Name:

Date of Visit:

**2. Have fertilizers been applied in the field recently?**

| Field         | Field         | Field         | Field         | Field         |
|---------------|---------------|---------------|---------------|---------------|
| Within 7 days |
| 8 to 14 days  |
| 15 to 30 days |
| 31 or more    |

| Field         | Field         | Field         | Field         | Field         |
|---------------|---------------|---------------|---------------|---------------|
| Within 7 days |
| 8 to 14 days  |
| 15 to 30 days |
| 31 or more    |

| Field         | Field         | Field         | Field         | Field         |
|---------------|---------------|---------------|---------------|---------------|
| Within 7 days |
| 8 to 14 days  |
| 15 to 30 days |
| 31 or more    |

| Field         | Field         | Field         | Field         | Field         |
|---------------|---------------|---------------|---------------|---------------|
| Within 7 days |
| 8 to 14 days  |
| 15 to 30 days |
| 31 or more    |

Risk Factors Associated with *Salmonella* and *Listeria monocytogenes* Contamination in Produce Fields

Questionnaire Completed by:

Farm Name:

Date of Visit:

**3. Has manure (slurry) been applied in the field recently?**

| Field         | Field         | Field         | Field         | Field         |
|---------------|---------------|---------------|---------------|---------------|
| Within a year |
| Year or more  |
| Not applied   |

| Field         | Field         | Field         | Field         | Field         |
|---------------|---------------|---------------|---------------|---------------|
| Within a year |
| Year or more  |
| Not applied   |

| Field         | Field         | Field         | Field         | Field         |
|---------------|---------------|---------------|---------------|---------------|
| Within a year |
| Year or more  |
| Not applied   |

| Field         | Field         | Field         | Field         | Field         |
|---------------|---------------|---------------|---------------|---------------|
| Within a year |
| Year or more  |
| Not applied   |

Risk Factors Associated with *Salmonella* and *Listeria monocytogenes* Contamination in Produce Fields

Questionnaire Completed by:

Farm Name:

Date of Visit:

**4. Has wildlife been observed in the field recently?**

| Field         | Field         | Field         | Field         | Field         |
|---------------|---------------|---------------|---------------|---------------|
| Within 3 days |
| 4 to 7 days   |
| 8 to 30 days  |
| 31 or more    |

| Field         | Field         | Field         | Field         | Field         |
|---------------|---------------|---------------|---------------|---------------|
| Within 3 days |
| 4 to 7 days   |
| 8 to 30 days  |
| 31 or more    |

| Field         | Field         | Field         | Field         | Field         |
|---------------|---------------|---------------|---------------|---------------|
| Within 3 days |
| 4 to 7 days   |
| 8 to 30 days  |
| 31 or more    |

| Field         | Field         | Field         | Field         | Field         |
|---------------|---------------|---------------|---------------|---------------|
| Within 3 days |
| 4 to 7 days   |
| 8 to 30 days  |
| 31 or more    |

**Types of wildlife observed in fields (list)?**

Risk Factors Associated with *Salmonella* and *Listeria monocytogenes* Contamination in Produce Fields

Questionnaire Completed by:

Farm Name:

Date of Visit:

**5. Do domestic animals have access to the field?**

| Field | Field | Field | Field | Field | Field |
|-------|-------|-------|-------|-------|-------|
| Yes   | Yes   | Yes   | Yes   | Yes   | Yes   |
| No    | No    | No    | No    | No    | No    |

| Field | Field | Field | Field | Field | Field |
|-------|-------|-------|-------|-------|-------|
| Yes   | Yes   | Yes   | Yes   | Yes   | Yes   |
| No    | No    | No    | No    | No    | No    |

| Field | Field | Field | Field | Field | Field |
|-------|-------|-------|-------|-------|-------|
| Yes   | Yes   | Yes   | Yes   | Yes   | Yes   |
| No    | No    | No    | No    | No    | No    |

| Field | Field | Field | Field | Field | Field |
|-------|-------|-------|-------|-------|-------|
| Yes   | Yes   | Yes   | Yes   | Yes   | Yes   |
| No    | No    | No    | No    | No    | No    |

**What type of domestic animal (list)?**



Risk Factors Associated with *Salmonella* and *Listeria monocytogenes* Contamination in Produce Fields

Questionnaire Completed by:

Farm Name:

Date of Visit:

**6. Have workers been in the field recently (not in equipment, we are referring to by foot)?**

| Field         | Field         | Field         | Field         | Field         |
|---------------|---------------|---------------|---------------|---------------|
| Within 3 days |
| 4 to 7 days   |
| 8 to 30 days  |
| 31 or more    |

| Field         | Field         | Field         | Field         | Field         |
|---------------|---------------|---------------|---------------|---------------|
| Within 3 days |
| 4 to 7 days   |
| 8 to 30 days  |
| 31 or more    |

| Field         | Field         | Field         | Field         | Field         |
|---------------|---------------|---------------|---------------|---------------|
| Within 3 days |
| 4 to 7 days   |
| 8 to 30 days  |
| 31 or more    |

| Field         | Field         | Field         | Field         | Field         |
|---------------|---------------|---------------|---------------|---------------|
| Within 3 days |
| 4 to 7 days   |
| 8 to 30 days  |
| 31 or more    |

Risk Factors Associated with *Salmonella* and *Listeria monocytogenes* Contamination in Produce Fields

Questionnaire Completed by:

Farm Name:

Date of Visit:

**7. Has field been irrigated recently?**

| Field             | Field             | Field             | Field             | Field             |
|-------------------|-------------------|-------------------|-------------------|-------------------|
| Within 3 days     |
| 4 to 7 days       |
| 8 to 14 days      |
| 15 or more, never |
| Type:             | Type:             | Type:             | Type:             | Type:             |
| Source:           | Source:           | Source:           | Source:           | Source:           |

| Field             | Field             | Field             | Field             | Field             |
|-------------------|-------------------|-------------------|-------------------|-------------------|
| Within 3 days     |
| 4 to 7 days       |
| 8 to 14 days      |
| 15 or more, never |
| Type:             | Type:             | Type:             | Type:             | Type:             |
| Source:           | Source:           | Source:           | Source:           | Source:           |

| Field             | Field             | Field             | Field             | Field             |
|-------------------|-------------------|-------------------|-------------------|-------------------|
| Within 3 days     |
| 4 to 7 days       |
| 8 to 14 days      |
| 15 or more, never |
| Type:             | Type:             | Type:             | Type:             | Type:             |
| Source:           | Source:           | Source:           | Source:           | Source:           |

| Field             | Field             | Field             | Field             | Field             |
|-------------------|-------------------|-------------------|-------------------|-------------------|
| Within 3 days     |
| 4 to 7 days       |
| 8 to 14 days      |
| 15 or more, never |
| Type:             | Type:             | Type:             | Type:             | Type:             |
| Source:           | Source:           | Source:           | Source:           | Source:           |

Risk Factors Associated with *Salmonella* and *Listeria monocytogenes* Contamination in Produce Fields

Questionnaire Completed by:

Farm Name:

Date of Visit:

**8. Has soil been cultivated or tilled in the field recently?**

| Field         | Field         | Field         | Field         | Field         |
|---------------|---------------|---------------|---------------|---------------|
| Within 7 days |
| 8 to 14 days  |
| 15 to 30 days |
| 31 or more    |

| Field         | Field         | Field         | Field         | Field         |
|---------------|---------------|---------------|---------------|---------------|
| Within 7 days |
| 8 to 14 days  |
| 15 to 30 days |
| 31 or more    |

| Field         | Field         | Field         | Field         | Field         |
|---------------|---------------|---------------|---------------|---------------|
| Within 7 days |
| 8 to 14 days  |
| 15 to 30 days |
| 31 or more    |

| Field         | Field         | Field         | Field         | Field         |
|---------------|---------------|---------------|---------------|---------------|
| Within 7 days |
| 8 to 14 days  |
| 15 to 30 days |
| 31 or more    |

Risk Factors Associated with *Salmonella* and *Listeria monocytogenes* Contamination in Produce Fields

Questionnaire Completed by:

Farm Name:

Date of Visit:

**9. Status of field?**

| Field     | Field     | Field     | Field     | Field     |
|-----------|-----------|-----------|-----------|-----------|
| Fallow    | Fallow    | Fallow    | Fallow    | Fallow    |
| Unplanted | Unplanted | Unplanted | Unplanted | Unplanted |
| Planted   | Planted   | Planted   | Planted   | Planted   |
| Other     | Other     | Other     | Other     | Other     |

| Field     | Field     | Field     | Field0    | Field1    |
|-----------|-----------|-----------|-----------|-----------|
| Fallow    | Fallow    | Fallow    | Fallow    | Fallow    |
| Unplanted | Unplanted | Unplanted | Unplanted | Unplanted |
| Planted   | Planted   | Planted   | Planted   | Planted   |
| Other     | Other     | Other     | Other     | Other     |

| Field3    | Field4    | Field5    | Field6    | Field7    |
|-----------|-----------|-----------|-----------|-----------|
| Fallow    | Fallow    | Fallow    | Fallow    | Fallow    |
| Unplanted | Unplanted | Unplanted | Unplanted | Unplanted |
| Planted   | Planted   | Planted   | Planted   | Planted   |
| Other     | Other     | Other     | Other     | Other     |

| Field9    | Field0    | Field1    | Field2    | Field3    |
|-----------|-----------|-----------|-----------|-----------|
| Fallow    | Fallow    | Fallow    | Fallow    | Fallow    |
| Unplanted | Unplanted | Unplanted | Unplanted | Unplanted |
| Planted   | Planted   | Planted   | Planted   | Planted   |
| Other     | Other     | Other     | Other     | Other     |

Risk Factors Associated with *Salmonella* and *Listeria monocytogenes* Contamination in Produce Fields

Questionnaire Completed by:

Farm Name:

Date of Visit:

**10. Is the crop organic in the field?**

| Field | Field | Field | Field | Field |
|-------|-------|-------|-------|-------|
| Yes   | Yes   | Yes   | Yes   | Yes   |
| No    | No    | No    | No    | No    |
| Other | Other | Other | Other | Other |

| Field | Field | Field | Field | Field |
|-------|-------|-------|-------|-------|
| Yes   | Yes   | Yes   | Yes   | Yes   |
| No    | No    | No    | No    | No    |
| Other | Other | Other | Other | Other |

| Field | Field | Field | Field | Field |
|-------|-------|-------|-------|-------|
| Yes   | Yes   | Yes   | Yes   | Yes   |
| No    | No    | No    | No    | No    |
| Other | Other | Other | Other | Other |

| Field | Field | Field | Field | Field |
|-------|-------|-------|-------|-------|
| Yes   | Yes   | Yes   | Yes   | Yes   |
| No    | No    | No    | No    | No    |
| Other | Other | Other | Other | Other |

**\* (other may refer to no crop in the field)**

Risk Factors Associated with *Salmonella* and *Listeria monocytogenes* Contamination in Produce Fields

Questionnaire Completed by:

Farm Name:

Date of Visit:

**11. Is there a buffer zone separating the field from potential pathogen reservoirs (e.g., forest, road, water)?**

| Field | Field | Field | Field | Field |
|-------|-------|-------|-------|-------|
| Yes   | Yes   | Yes   | Yes   | Yes   |
| No    | No    | No    | No    | No    |

| Field | Field | Field | Field | Field |
|-------|-------|-------|-------|-------|
| Yes   | Yes   | Yes   | Yes   | Yes   |
| No    | No    | No    | No    | No    |

| Field | Field | Field | Field | Field |
|-------|-------|-------|-------|-------|
| Yes   | Yes   | Yes   | Yes   | Yes   |
| No    | No    | No    | No    | No    |

| Field | Field | Field | Field | Field |
|-------|-------|-------|-------|-------|
| Yes   | Yes   | Yes   | Yes   | Yes   |
| No    | No    | No    | No    | No    |

Risk Factors Associated with *Salmonella* and *Listeria monocytogenes* Contamination in Produce Fields

Questionnaire Completed by:

Farm Name:

Date of Visit:

**Additional Notes or Comments:**
